# Supplementary material for: Full-length transcriptome sequencing analysis and development of EST-SSR markers for the endangered species Populus wulianensis
Source: PubMed Central journal article supplement (PMC7530656; doi:10.1038/s41598-020-73289-5), 2020-10-01
Supplement: 41598_2020_73289_MOESM1_ESM.pdf [file 41598_2020_73289_MOESM1_ESM.pdf]

## Supplementary Information

(Supplementary Figure S1 to Figure S8 )

(Supplementary Table S1, Table S5, Table S6, Table S7)

### **Full-length transcriptome sequencing analysis and development of EST-SSR markers for the endangered species *Populus wulianensis***

Qichao Wu<sup>1+</sup> Fengqi Zang<sup>2+</sup> Xiaoman Xie<sup>3</sup> Yan Ma<sup>1\*</sup> Yongqi Zheng<sup>2</sup> Dekui Zang<sup>1</sup>

<sup>1</sup> College of Forestry, Key Laboratory of State Forestry Administration for Silviculture of the Lower Yellow River, Shandong Agricultural University, Tai'an 271018, China

<sup>2</sup> Institute of Forestry, Chinese Academy of Forestry, Beijing 100091, P. R. China

<sup>3</sup> Center for Forest Genetic Resources of Shandong Province, Jinan 250014, China

+ Co-first author, these authors contributed equally to this work

\* the corresponding author: [myiris@sina.com](mailto:myiris@sina.com)

(Supplementary Figure S1 to Figure S8 )

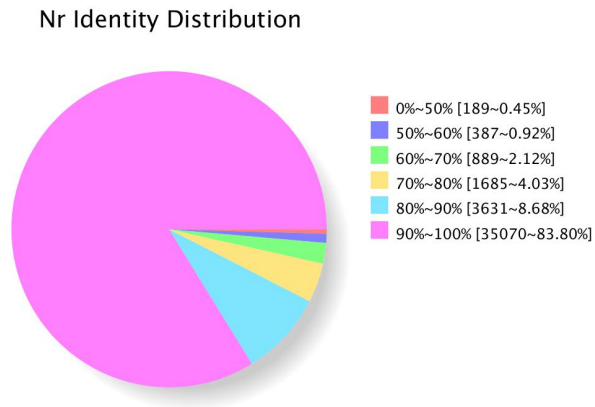

Supplementary Figure S1. Nr identity distribution.

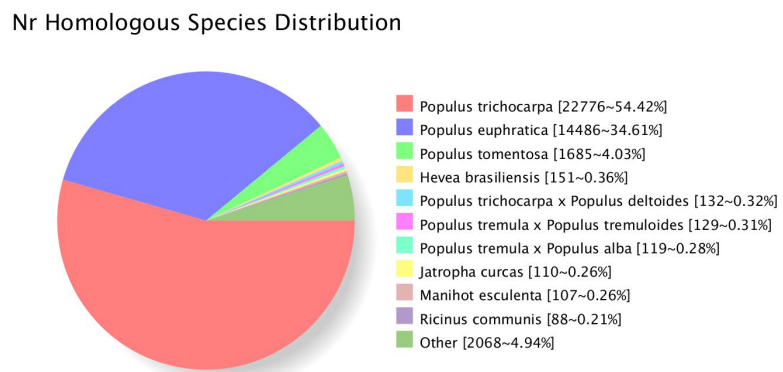

Supplementary Figure S2. Nr homologous species distribution.

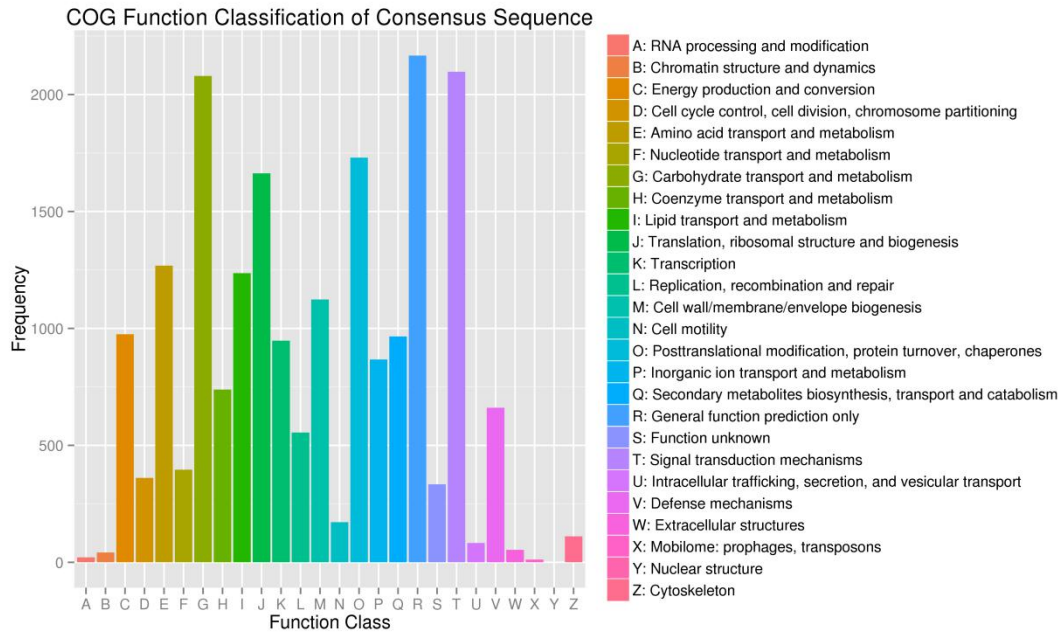

Supplementary Figure S3. COG functional classification of *P. wulianensis* transcript sequences.

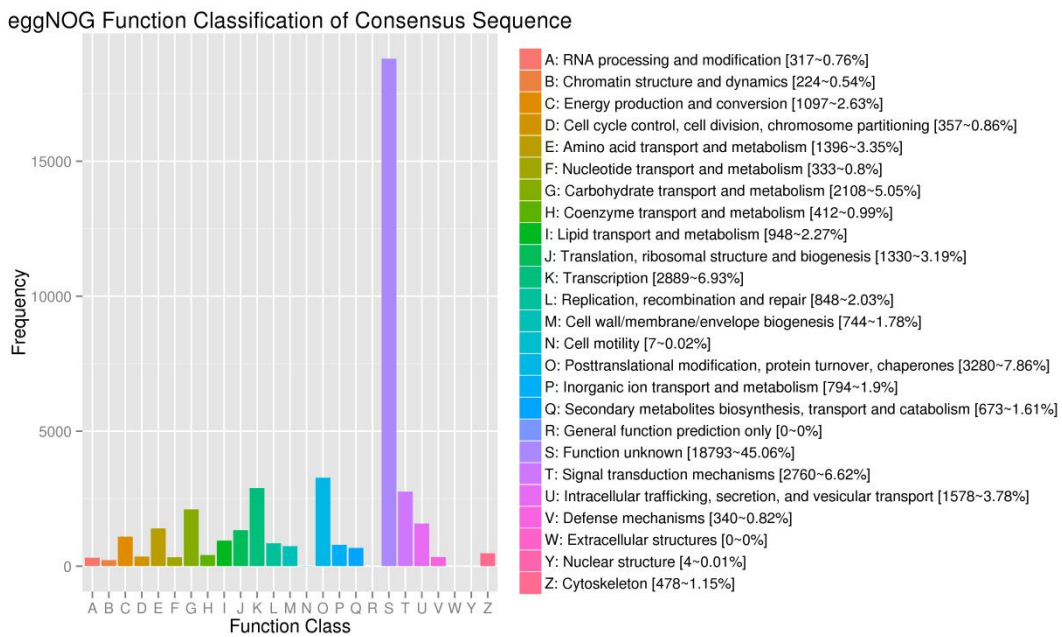

Supplementary Figure S4. EggNOG functional classification of *P. wulianensis* transcript sequences.

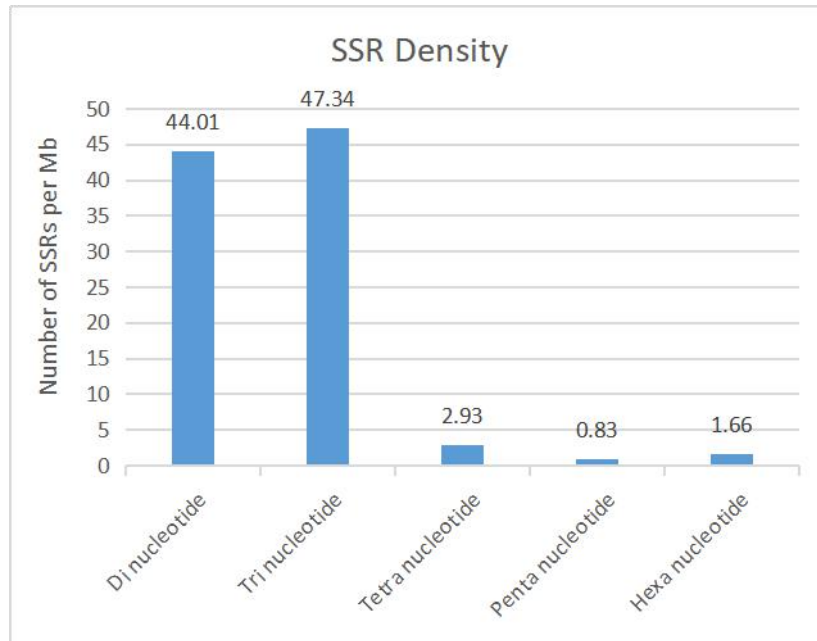

**Supplementary Figure S5.** SSR density of *P. wulianensis*.

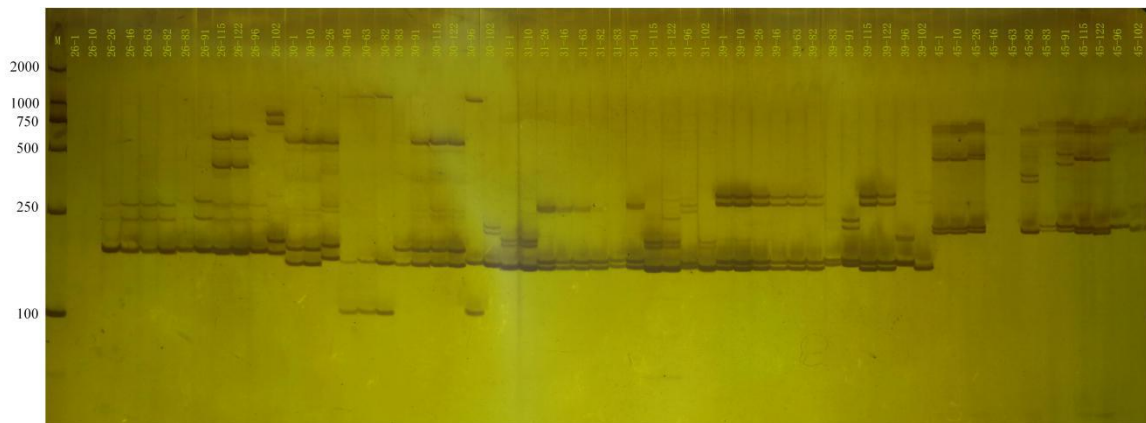

**Supplementary Figure S6.** Gel photographs of genotyping 1. Note: M- Marker; Primers- 26, 30, 31, 39, 45; Samples- *P. wulianensis* (1, 10, 26, 46, 63, 82, 83, 91, 115, 122), *P. adenopoda* (96), *P. davidiana* (102).



## (Supplementary Table S1, Table S5, Table S6, Table S7)

**Table S1** Information of the samples used in the present study.

| Item                                                | Samples                                          | Location                                | Latitude<br>(°N) | Longitude<br>(°E) | Altitude<br>(m) | Appraiser  | Voucher specimen     | Storage<br>location |
|-----------------------------------------------------|--------------------------------------------------|-----------------------------------------|------------------|-------------------|-----------------|------------|----------------------|---------------------|
| Samples for<br>transcriptomic<br>analysis           | <i>Populus wulianensis</i><br>( male specimen)   | Mt. Kunyu, Yantai City, Shandong Prov.  | 37.27446         | 121.75936         | 186             | Dekui Zang | ZangDK-SDKY-2018-001 | SDAU                |
|                                                     | <i>Populus wulianensis</i><br>( female specimen) | Mt. Kunyu, Yantai City, Shandong Prov.  | 37.27446         | 121.75936         | 186             | Dekui Zang | ZangDK-SDKY-2018-002 | SDAU                |
|                                                     | <i>Populus wulianensis</i>                       | Mt. Zhaohu, Yantai City, Shandong Prov. | 36.85928         | 121.19879         | 156             | Dekui Zang |                      |                     |
|                                                     | <i>Populus wulianensis</i>                       | Mt. Zhaohu, Yantai City, Shandong Prov. | 36.85920         | 121.19875         | 155             | Dekui Zang |                      |                     |
|                                                     | <i>Populus wulianensis</i>                       | Mt. Zhaohu, Yantai City, Shandong Prov. | 36.85952         | 121.19878         | 156             | Dekui Zang |                      |                     |
|                                                     | <i>Populus wulianensis</i>                       | Mt. Zhaohu, Yantai City, Shandong Prov. | 36.86063         | 121.20077         | 154             | Dekui Zang | ZangDK-SDZH-2018-001 | SDAU                |
|                                                     | <i>Populus wulianensis</i>                       | Mt. Zhaohu, Yantai City, Shandong Prov. | 36.86066         | 121.20087         | 155             | Dekui Zang |                      |                     |
|                                                     | <i>Populus wulianensis</i>                       | Mt. Zhaohu, Yantai City, Shandong Prov. | 36.86082         | 121.20116         | 156             | Dekui Zang |                      |                     |
|                                                     | <i>Populus wulianensis</i>                       | Mt. Kunyu, Yantai City, Shandong Prov.  | 37.27414         | 121.76046         | 189             | Dekui Zang |                      |                     |
|                                                     | <i>Populus wulianensis</i>                       | Mt. Kunyu, Yantai City, Shandong Prov.  | 37.27405         | 121.76022         | 193             | Dekui Zang |                      |                     |
| Samples for<br>EST-SSRs<br>polymorphism<br>analysis | <i>Populus wulianensis</i>                       | Mt. Kunyu, Yantai City, Shandong Prov.  | 37.27401         | 121.75983         | 199             | Dekui Zang |                      |                     |
|                                                     | <i>Populus wulianensis</i>                       | Mt. Kunyu, Yantai City, Shandong Prov.  | 37.27446         | 121.75800         | 227             | Dekui Zang | ZangDK-SDKY-2017-003 | SDAU                |
|                                                     | <i>Populus wulianensis</i>                       | Mt. Kunyu, Yantai City, Shandong Prov.  | 37.27529         | 121.75452         | 306             | Dekui Zang |                      |                     |
|                                                     | <i>Populus wulianensis</i>                       | Mt. Kunyu, Yantai City, Shandong Prov.  | 37.27333         | 121.75771         | 238             | Dekui Zang |                      |                     |
|                                                     | <i>Populus wulianensis</i>                       | Mt.Jiuxian, Rizhao City, Shandong Prov. | 35.68243         | 119.35881         | 372             | Dekui Zang |                      |                     |
|                                                     | <i>Populus wulianensis</i>                       | Mt.Jiuxian, Rizhao City, Shandong Prov. | 35.68243         | 119.35883         | 373             | Dekui Zang |                      |                     |
|                                                     | <i>Populus wulianensis</i>                       | Mt.Jiuxian, Rizhao City, Shandong Prov. | 35.68248         | 119.35872         | 371             | Dekui Zang |                      |                     |

|                            |                                           |          |           |     |            |                      |      |
|----------------------------|-------------------------------------------|----------|-----------|-----|------------|----------------------|------|
| <i>Populus wulianensis</i> | Mt.Jiuxian, Rizhao City, Shandong Prov.   | 35.68212 | 119.35917 | 366 | Dekui Zang | ZangDK-SDJX-2017-001 | SDAU |
| <i>Populus wulianensis</i> | Mt.Jiuxian, Rizhao City, Shandong Prov.   | 35.68218 | 119.35919 | 365 | Dekui Zang |                      |      |
| <i>Populus wulianensis</i> | Mt.Jiuxian, Rizhao City, Shandong Prov.   | 35.68217 | 119.35917 | 366 | Dekui Zang |                      |      |
| <i>Populus wulianensis</i> | Mt.Juyu, Weihai City, Shandong Prov.      | 36.87389 | 121.37694 | 124 | Dekui Zang |                      |      |
| <i>Populus wulianensis</i> | Mt.Juyu, Weihai City, Shandong Prov.      | 36.87389 | 121.37722 | 125 | Dekui Zang |                      |      |
| <i>Populus wulianensis</i> | Mt.Juyu, Weihai City, Shandong Prov.      | 36.87389 | 121.37694 | 125 | Dekui Zang |                      |      |
| <i>Populus wulianensis</i> | Mt.Juyu, Weihai City, Shandong Prov.      | 36.87361 | 121.37722 | 124 | Dekui Zang | ZangDK-SDJY-2018-001 | SDAU |
| <i>Populus wulianensis</i> | Mt.Juyu, Weihai City, Shandong Prov.      | 36.87111 | 121.37750 | 123 | Dekui Zang |                      |      |
| <i>Populus wulianensis</i> | Mt.Juyu, Weihai City, Shandong Prov.      | 36.87390 | 121.37722 | 125 | Dekui Zang |                      |      |
| <i>Populus adenopoda</i>   | Mt. Tianmu, Hangzhou City, Zhejiang Prov. | 30.32824 | 119.45341 | 452 | Dekui Zang |                      |      |
| <i>Populus adenopoda</i>   | Mt. Tianmu, Hangzhou City, Zhejiang Prov. | 30.32925 | 119.45065 | 469 | Dekui Zang | ZangDK-HZTM-2017-00  | SDAU |
| <i>Populus adenopoda</i>   | Mt. Tianmu, Hangzhou City, Zhejiang Prov. | 30.32969 | 119.45081 | 467 | Dekui Zang | 1                    |      |
| <i>Populus davidiana</i>   | Mt. Culai, Tai'an City, Shandong          | 36.05372 | 117.29620 | 787 | Dekui Zang |                      |      |
| <i>Populus davidiana</i>   | Mt. Culai, Tai'an City, Shandong          | 36.05355 | 117.29261 | 792 | Dekui Zang | ZangDK-SDCL-2018-001 | SDAU |
| <i>Populus davidiana</i>   | Mt. Culai, Tai'an City, Shandong          | 36.05351 | 117.29269 | 792 | Dekui Zang |                      |      |

Mt- mountain; Prov- province; SDAU- Shandong Agricultural University.

**Table S5** Amplification results with the 100 EST-SSR markers.

| NO. | Amplification results              | Number of primers | Percentage( %) |
|-----|------------------------------------|-------------------|----------------|
| 1   | No amplification                   | 12                | 12%            |
| 2   | Poor universal applicability       | 31                | 31%            |
| 3   | Multiple bands                     | 8                 | 8%             |
| 4   | Monomorphism                       | 12                | 12%            |
| 5   | Unstable and Unclear amplification | 19                | 19%            |
| 6   | Stable and clear amplification     | 18                | 18%            |



**Table S6** Eighteen polymorphic EST-SSR markers.

| Primer | Type             | SSRs             | Forward Primer (5'-3 ') | T <sub>m</sub> (°C)  | Reverse Primer (5'-3 ') | T <sub>m</sub> (°C)  | Gene ID                |
|--------|------------------|------------------|-------------------------|----------------------|-------------------------|----------------------|------------------------|
| PW11   | Di-nucleotide    | (GA)13           | CAACACCCCAACTTCATCT     | 55.0                 | CGCACAAATGAGCTAATCTCG   | 53.8                 | F01_c2795/f1p0/1068    |
| PW20   |                  | (TG)15           | TCTCTCTCTTCCACTCCCA     | 57.1                 | TAGCCACGAAAGCCTAAAGC    | 55.2                 | F01_c10080/f3p1/2131   |
| PW26   | Tri-nucleotide   | (AGA)9           | CCCCAGTATCCCGATCTAT     | 55.6                 | AACTGACATGAACTTCCCCG    | 54.9                 | F01_c4598/f2p1/1790    |
| PW30   |                  | (ATC)12          | TCGTAGGTCTCCCTGTTGCT    | 58.1                 | GCCGAGCTTGAGCTTGTTAT    | 55.5                 | F01_c13558/f1p5/3843   |
| PW31   | Tetra-nucleotide | (ATG)6           | TAATCAGGAGCAGCAGCAGA    | 56.0                 | GAGCAGAGACCAAAAGGCAC    | 56.7                 | F01_c16660/f1p0/2075   |
| PW39   |                  | (GCC)7           | CCTCCACCACTCTCATCTCC    | 57.4                 | AGAGCCACGAGTCAAGGAAA    | 56.1                 | F01_c13084/f1p3/1371   |
| PW46   |                  | (CCTC)7          | ACCGCATCTAAAACGGACAC    | 55.4                 | GAGGAAATTAACAACCGCCA    | 52.8                 | F01_c38049/f2p2/1750   |
| PW50   |                  | (TCCC)8          | ACGGCGCTCTGAACTGATA     | 56.3                 | TGATCAGACCCACCAAACAA    | 53.7                 | F01_c610/f1p1/954      |
| PW56   |                  | (AAGA)5          | TCCATGGAAAACGAATCCTC    | 52.0                 | GCCCATGTTGGTGTTCCTC     | 54.5                 | F01_c2199/f3p0/1869    |
| PW67   |                  | Penta-nucleotide | (GTTTT)6                | AATGATTCCAGCCGATGAAG | 52.4                    | CCCTTGTCATGGCTACGATT | 54.8                   |
| PW69   | (CTCCT)6         |                  | CATCCCATCTCCTCCACTTC    | 55.0                 | AAAAACCCACTTTGGTGCTG    | 53.8                 | F01_c22425/f15p13/2163 |
| PW81   | Hexa-nucleotide  | (CCGCCA)5        | AAAAGACCAAAACAACCCCA    | 52.0                 | GCACGGGCAAGAGAAGATAG    | 56.0                 | F01_c1837/f3p0/1348    |
| PW82   |                  | (TCCCTC)5        | GCTTCCAGAGTCTGCAGAGAA   | 56.9                 | TCCTGAAAAGACCAGCGAGT    | 56.1                 | F01_c7659/f1p0/1523    |
| PW84   |                  | (CGCCAC)8        | ATCACCACCACCACCTCTTC    | 57.2                 | TTTGTGGGTTTTTGAGGGAG    | 52.7                 | F01_c13779/f2p1/1781   |
| PW89   |                  | (GACAAG)5        | CTCAACCGAAGCTGAACCTC    | 56.1                 | TGAAAACGGCCATATGTTGA    | 51.6                 | F01_c28730/f1p2/1316   |
| PW95   |                  | (GGCGAA)5        | TGGATGGGAGGTTTAGGTTG    | 54.3                 | AGCCCAAGTTCTCTGCAAAA    | 54.5                 | F01_c9174/f2p1/2674    |
| PW96   |                  | (TGGAAC)5        | TCACTTGGTTTGGGTGTTGA    | 54.1                 | GTTTTTCAAAGCTCCGACG     | 52.2                 | F01_c16585/f1p0/2332   |
| PW97   |                  | (GGCATG)6        | CCTACGATTGGTTCTGGCAT    | 54.8                 | TGCATTCCCTCCATAACCTCC   | 54.3                 | F01_c1002/f6p5/3467    |

**Table S7.** Characterization of 18 polymorphic EST-SSR markers for *P. wulianensis*.

| Pops                  | Primer               | PW11                 | PW20  | PW26  | PW30  | PW31  | PW39  | PW46  | PW50  | PW56  | PW67  | PW69  | PW81  | PW82  | PW84  | PW89  | PW95  | PW96  | PW97  | Mean  |
|-----------------------|----------------------|----------------------|-------|-------|-------|-------|-------|-------|-------|-------|-------|-------|-------|-------|-------|-------|-------|-------|-------|-------|
|                       | ZHS                  | <i>N<sub>A</sub></i> | 2     | 5     | 4     | 4     | 2     | 3     | 2     | 4     | 2     | 3     | 3     | 4     | 3     | 4     | 3     | 3     | 4     | 4     |
|                       | <i>H<sub>O</sub></i> | 1.000                | 1.000 | 1.000 | 1     | 1.000 | 1.000 | 1.000 | 1.000 | 1.000 | 0.667 | 1.000 | 1.000 | 1.000 | 1.000 | 1.000 | 1.000 | 0.667 | 1.000 | 0.963 |
|                       | <i>H<sub>E</sub></i> | 0.500                | 0.778 | 0.625 | 0.639 | 0.500 | 0.569 | 0.500 | 0.639 | 0.500 | 0.486 | 0.611 | 0.639 | 0.569 | 0.681 | 0.611 | 0.625 | 0.625 | 0.639 | 0.596 |
|                       | <i>PIC</i>           | 0.375                | 0.744 | 0.560 | 0.568 | 0.375 | 0.476 | 0.375 | 0.568 | 0.375 | 0.423 | 0.536 | 0.568 | 0.476 | 0.622 | 0.536 | 0.555 | 0.560 | 0.568 | 0.514 |
| KYS                   | <i>N<sub>A</sub></i> | 5                    | 5     | 4     | 3     | 2     | 3     | 2     | 2     | 3     | 4     | 5     | 3     | 3     | 5     | 3     | 4     | 3     | 3     | 3.444 |
|                       | <i>H<sub>O</sub></i> | 1.000                | 0.500 | 0.500 | 0.600 | 1.000 | 1.000 | 0.500 | 0.600 | 1.000 | 1.000 | 0.500 | 1.000 | 0.800 | 0.667 | 1.000 | 1.000 | 0.400 | 1.000 | 0.782 |
|                       | <i>H<sub>E</sub></i> | 0.750                | 0.681 | 0.514 | 0.660 | 0.500 | 0.580 | 0.375 | 0.420 | 0.620 | 0.722 | 0.681 | 0.569 | 0.540 | 0.750 | 0.625 | 0.660 | 0.640 | 0.625 | 0.606 |
|                       | <i>PIC</i>           | 0.712                | 0.642 | 0.476 | 0.586 | 0.375 | 0.492 | 0.305 | 0.332 | 0.548 | 0.672 | 0.642 | 0.476 | 0.466 | 0.708 | 0.555 | 0.596 | 0.563 | 0.555 | 0.539 |
| JXS                   | <i>N<sub>A</sub></i> | 2                    | 3     | 4     | 3     | 2     | 6     | 2     | 2     | 2     | 2     | 3     | 4     | 2     | 6     | 2     | 2     | 1     | 2     | 2.778 |
|                       | <i>H<sub>O</sub></i> | 0.000                | 0.000 | 1.000 | 0.833 | 1.000 | 1.000 | 0.833 | 0.500 | 1.000 | 1.000 | 1.000 | 1.000 | 0.833 | 0.833 | 0.000 | 1.000 | 0.000 | 1.000 | 0.713 |
|                       | <i>H<sub>E</sub></i> | 0.500                | 0.500 | 0.750 | 0.625 | 0.500 | 0.820 | 0.486 | 0.375 | 0.500 | 0.500 | 0.580 | 0.639 | 0.486 | 0.792 | 0.375 | 0.500 | 0.000 | 0.500 | 0.524 |
|                       | <i>PIC</i>           | 0.375                | 0.449 | 0.703 | 0.545 | 0.375 | 0.794 | 0.368 | 0.305 | 0.375 | 0.375 | 0.492 | 0.568 | 0.368 | 0.763 | 0.305 | 0.375 | 0.000 | 0.375 | 0.439 |
| JYS                   | <i>N<sub>A</sub></i> | 4                    | 2     | 4     | 4     | 2     | 6     | 2     | 6     | 2     | 3     | 3     | 2     | 3     | 4     | 4     | 4     | 1     | 2     | 3.222 |
|                       | <i>H<sub>O</sub></i> | 1.000                | 1.000 | 1.000 | 1.000 | 1.000 | 1.000 | 1.000 | 1.000 | 1.000 | 1.000 | 1.000 | 1.000 | 1.000 | 1.000 | 1.000 | 1.000 | 0.000 | 1.000 | 0.944 |
|                       | <i>H<sub>E</sub></i> | 0.639                | 0.500 | 0.722 | 0.639 | 0.500 | 0.750 | 0.500 | 0.806 | 0.500 | 0.594 | 0.611 | 0.500 | 0.625 | 0.722 | 0.700 | 0.681 | 0.000 | 0.500 | 0.583 |
|                       | <i>PIC</i>           | 0.568                | 0.375 | 0.672 | 0.568 | 0.375 | 0.712 | 0.375 | 0.777 | 0.375 | 0.511 | 0.536 | 0.375 | 0.555 | 0.672 | 0.645 | 0.622 | 0.000 | 0.375 | 0.505 |
| <i>P. wulianensis</i> | <i>N<sub>A</sub></i> | 8                    | 10    | 7     | 7     | 4     | 9     | 4     | 6     | 4     | 7     | 6     | 9     | 3     | 13    | 5     | 4     | 6     | 5     | 6.500 |
|                       | <i>H<sub>O</sub></i> | 0.800                | 0.625 | 0.864 | 0.870 | 1.000 | 1.000 | 0.818 | 0.810 | 1.000 | 0.900 | 0.870 | 1.000 | 0.913 | 0.875 | 0.810 | 1.000 | 0.316 | 1.000 | 0.860 |

|                     |       |       |       |       |       |       |       |       |       |       |       |       |       |       |       |       |       |       |       |       |
|---------------------|-------|-------|-------|-------|-------|-------|-------|-------|-------|-------|-------|-------|-------|-------|-------|-------|-------|-------|-------|-------|
|                     | $H_E$ | 0.804 | 0.852 | 0.801 | 0.758 | 0.681 | 0.721 | 0.582 | 0.724 | 0.651 | 0.765 | 0.656 | 0.796 | 0.606 | 0.870 | 0.769 | 0.660 | 0.727 | 0.636 | 0.726 |
|                     | $PIC$ | 0.777 | 0.835 | 0.772 | 0.722 | 0.623 | 0.679 | 0.531 | 0.681 | 0.597 | 0.737 | 0.607 | 0.770 | 0.528 | 0.857 | 0.731 | 0.597 | 0.682 | 0.565 | 0.683 |
| <i>P. adenopoda</i> | $N_A$ | 3     | 3     | 3     | 2     | 3     | 3     | 2     | 2     | 2     | 3     | 3     | 2     | 3     | 3     | 3     | 3     | 1     | 3     | 2.611 |
|                     | $H_O$ | 0.333 | 0.667 | 0.333 | 0.000 | 0.667 | 1.000 | 0.500 | 0.000 | 0.500 | 0.500 | 0.667 | 0.667 | 0.333 | 0.500 | 0.333 | 0.333 | 0.000 | 1.000 | 0.463 |
|                     | $H_E$ | 0.611 | 0.611 | 0.611 | 0.444 | 0.611 | 0.625 | 0.375 | 0.444 | 0.375 | 0.625 | 0.611 | 0.444 | 0.500 | 0.625 | 0.500 | 0.611 | 0.000 | 0.611 | 0.513 |
|                     | $PIC$ | 0.536 | 0.536 | 0.536 | 0.346 | 0.536 | 0.555 | 0.305 | 0.345 | 0.305 | 0.555 | 0.536 | 0.346 | 0.449 | 0.555 | 0.449 | 0.536 | 0.000 | 0.536 | 0.442 |
| <i>P. davidiana</i> | $N_A$ | 4     | 3     | 4     | 4     | 5     | 3     | 3     | 3     | 3     | 1     | 5     | 2     | 4     | 4     | 2     | 1     | 2     | 2     | 3.056 |
|                     | $H_O$ | 0.333 | 0.333 | 0.667 | 0.667 | 1.000 | 0.333 | 0.667 | 0.333 | 0.667 | 0.000 | 1.000 | 0.000 | 0.333 | 0.667 | 0.667 | 0.000 | 0.000 | 0.000 | 0.426 |
|                     | $H_E$ | 0.722 | 0.611 | 0.667 | 0.722 | 0.778 | 0.500 | 0.611 | 0.611 | 0.667 | 0.000 | 0.778 | 0.444 | 0.722 | 0.667 | 0.444 | 0.000 | 0.444 | 0.444 | 0.546 |
|                     | $PIC$ | 0.672 | 0.536 | 0.620 | 0.672 | 0.744 | 0.449 | 0.536 | 0.535 | 0.593 | 0.000 | 0.744 | 0.346 | 0.672 | 0.620 | 0.346 | 0.000 | 0.346 | 0.346 | 0.488 |
| All                 | $N_A$ | 11    | 12    | 9     | 9     | 8     | 11    | 5     | 7     | 6     | 7     | 8     | 9     | 6     | 15    | 8     | 5     | 7     | 7     | 8.333 |
|                     | $H_O$ | 0.692 | 0.600 | 0.786 | 0.759 | 0.966 | 0.926 | 0.778 | 0.667 | 0.920 | 0.760 | 0.862 | 0.867 | 0.793 | 0.828 | 0.741 | 0.792 | 0.261 | 0.900 | 0.772 |
|                     | $H_E$ | 0.829 | 0.867 | 0.802 | 0.773 | 0.722 | 0.745 | 0.637 | 0.721 | 0.704 | 0.772 | 0.746 | 0.827 | 0.690 | 0.877 | 0.765 | 0.662 | 0.742 | 0.717 | 0.755 |
|                     | $PIC$ | 0.809 | 0.854 | 0.775 | 0.742 | 0.677 | 0.710 | 0.591 | 0.677 | 0.664 | 0.740 | 0.714 | 0.805 | 0.637 | 0.865 | 0.735 | 0.603 | 0.704 | 0.671 | 0.721 |

ZHS, the test samples of *P. wulianensis* collected from Zhaohu Mountain; KYS, the test samples of *P. wulianensis* collected from Kunyu Mountain; JXS, the test samples of *P. wulianensis* collected from Jiuxian Mountain; JYS, the test samples of *P. wulianensis* collected from Juyu Mountain; *P. wulianensis*, the test samples of *P. wulianensis* collected from Zhaohu Mountain, Kunyu Mountain, Jiuxian Mountain, Juyu Mountain; *P. adenopoda*, the test samples of *P. adenopoda* collected from Tianmu Mountain; *P. davidiana*, the test samples of *P. adenopoda* collected from Culai Mountain; All, All of the above test samples including *P. wulianensis*, *P. adenopoda*, and *P. davidiana*;  $N_A$ , total number of alleles at that locus;  $H_O$ , observed Heterozygosity;  $H_E$ , expected Heterozygosity;  $PIC$ , polymorphic information content.
